# Supplementary material
Source: Springer Nature journal article supplement (https://www.springermedizin.de/resource/supplementary/13058_2013_3365_MOESM1_ESM.pdf/9703986)
Supplement: MOESM1 [file 9703986]

**Supplementary Table 1.** Risk of Invasive or *In Situ* Breast Cancer in Relation to Pubertal Variables, by Menopausal Status at Breast Cancer Incidence.

| Pubertal variable                               | Premenopausal                       |                                         | Postmenopausal                  |                                      |    |
|-------------------------------------------------|-------------------------------------|-----------------------------------------|---------------------------------|--------------------------------------|----|
|                                                 | <i>N</i> cases/<br>person-<br>years | Adjusted <sup>a</sup><br>HR<br>(95% CI) | <i>N</i> cases/<br>person-years | Adjusted <sup>a</sup><br>HR (95% CI) |    |
| <i>Age at thelarche, years</i>                  |                                     |                                         |                                 |                                      |    |
| ≤10                                             | 50/31646                            | 1.28 (0.92, 1.78)                       | 101/21657                       | 1.21 (0.97, 1.52)                    |    |
| 11-12                                           | 129/93573                           | Referent                                | 314/79815                       | Referent                             |    |
| ≥13                                             | 63/55694                            | 0.76 (0.56, 1.03)                       | 206/62843                       | 0.82 (0.69, 0.98)                    | *  |
| HR for trend                                    |                                     | 0.77 (0.64, 0.93)                       |                                 | 0.82 (0.73, 0.92)                    | ** |
| <i>Age at menarche, years</i>                   |                                     |                                         |                                 |                                      |    |
| ≤12                                             | 125/85966                           | 1.18 (0.91, 1.53)                       | 324/82511                       | 1.02 (0.87, 1.19)                    |    |
| 13-14                                           | 111/84229                           | Referent                                | 333/84504                       | Referent                             |    |
| ≥15                                             | 17/17924                            | 0.67 (0.40, 1.12)                       | 66/20184                        | 0.82 (0.63, 1.07)                    |    |
| HR for trend                                    |                                     | 0.80 (0.65, 0.97)                       |                                 | 0.93 (0.83, 1.04)                    | *  |
| <i>Age at regular periods, years</i>            |                                     |                                         |                                 |                                      |    |
| ≤12                                             | 58/38570                            | 1.08 (0.77, 1.53)                       | 154/40880                       | 0.96 (0.78, 1.19)                    |    |
| 13-14                                           | 76/50827                            | Referent                                | 216/54487                       | Referent                             |    |
| ≥15                                             | 23/23091                            | 0.66 (0.41, 1.05)                       | 81/26374                        | 0.77 (0.60, 0.99)                    | *  |
| Never had<br>regular periods                    | 17/13697                            | 1.13 (0.66, 1.91)                       | 56/11884                        | 1.18 (0.88, 1.58)                    |    |
| HR for trend <sup>b</sup>                       |                                     | 0.81 (0.65, 1.01)                       |                                 | 0.91 (0.80, 1.03)                    |    |
| <i>Age reached adult height, years</i>          |                                     |                                         |                                 |                                      |    |
| ≤14                                             | 52/35822                            | 1.14 (0.79, 1.64)                       | 146/36597                       | 1.31 (1.03, 1.65)                    | *  |
| 15-16                                           | 67/54299                            | Referent                                | 141/44336                       | Referent                             |    |
| ≥17                                             | 40/38938                            | 0.87 (0.59, 1.29)                       | 108/28928                       | 1.17 (0.91, 1.50)                    |    |
| HR for trend                                    |                                     | 0.88 (0.71, 1.08)                       |                                 | 0.93 (0.82, 1.06)                    |    |
| <i>Growth spurt between ages 7 and 11 years</i> |                                     |                                         |                                 |                                      |    |
| No                                              | 249/190051                          | Referent                                | 698/182031                      | Referent                             |    |
| Yes                                             | 29/17698                            | 1.26 (0.86, 1.86)                       | 69/16561                        | 1.07 (0.84, 1.37)                    |    |

Abbreviations: CI, Confidence interval; HR, Hazard ratio.

\* P<0.05; \*\* P<0.01; \*\*\* P<0.001.

<sup>a</sup> Adjusted for attained age, family history of breast cancer in a first-degree relative, adult height, age at first full-term pregnancy (with a term for nulliparous women) and hormone replacement therapy status.

<sup>b</sup> Test for trend excludes those who had never had a regular period.

**Supplementary Table 2.** Risk of Invasive or *In Situ* Breast Cancer in Relation to Duration Between Pubertal Events, by Menopausal Status at Breast Cancer Incidence.

| Pubertal variable                          | Premenopausal                |                                      | Postmenopausal               |                                      |    |
|--------------------------------------------|------------------------------|--------------------------------------|------------------------------|--------------------------------------|----|
|                                            | N cases/<br>person-<br>years | Adjusted <sup>a</sup><br>HR (95% CI) | N cases/<br>person-<br>years | Adjusted <sup>a</sup><br>HR (95% CI) |    |
| <i>Thelarche to menarche, years</i>        |                              |                                      |                              |                                      |    |
| <0                                         | 20/12926                     | 1.37 (0.83, 2.26)                    | 37/14454                     | 0.72 (0.51, 1.03)                    |    |
| 0                                          | 64/52498                     | Referent                             | 207/58670                    | Referent                             |    |
| 1                                          | 79/60246                     | 1.12 (0.80, 1.55)                    | 220/54721                    | 1.15 (0.95, 1.39)                    |    |
| ≥2                                         | 56/36910                     | 1.43 (1.00, 2.04)                    | 99/23391                     | 1.21 (0.95, 1.54)                    |    |
| HR for trend                               |                              | 1.09 (0.94, 1.27)                    |                              | 1.15 (1.04, 1.27)                    | ** |
| <i>Thelarche to regular periods, years</i> |                              |                                      |                              |                                      |    |
| <0                                         | 9/4284                       | 1.35 (0.65, 2.82)                    | 15/5450                      | 0.74 (0.43, 1.28)                    |    |
| 0                                          | 33/20303                     | Referent                             | 94/25448                     | Referent                             |    |
| 1                                          | 45/33407                     | 0.80 (0.51, 1.26)                    | 132/37188                    | 0.95 (0.73, 1.24)                    |    |
| ≥2                                         | 58/43573                     | 0.87 (0.57, 1.33)                    | 129/36576                    | 0.95 (0.73, 1.24)                    |    |
| Never became<br>regular                    | 17/13697                     | 1.02 (0.57, 1.84)                    | 56/11884                     | 1.24 (0.89, 1.73)                    |    |
| HR for trend <sup>b</sup>                  |                              | 0.91 (0.76, 1.09)                    |                              | 1.01 (0.90, 1.14)                    |    |
| <i>Menarche to regular periods, years</i>  |                              |                                      |                              |                                      |    |
| 0                                          | 99/63264                     | Referent                             | 277/69438                    | Referent                             |    |
| 1                                          | 45/32900                     | 0.86 (0.60, 1.23)                    | 133/37849                    | 0.87 (0.71, 1.07)                    |    |
| ≥2                                         | 13/16324                     | 0.55 (0.31, 0.98)                    | 41/14454                     | 0.71 (0.51, 0.99)                    | *  |
| Never became<br>regular                    | 17/13697                     | 1.06 (0.63, 1.78)                    | 56/11884                     | 1.16 (0.87, 1.55)                    |    |
| HR for trend <sup>b</sup>                  |                              | 0.78 (0.62, 0.99)                    |                              | 0.86 (0.74, 0.99)                    | *  |
| <i>Menarche to adult height, years</i>     |                              |                                      |                              |                                      |    |
| <0                                         | 4/2694                       | 1.07 (0.38, 3.03)                    | 10/3177                      | 0.85 (0.44, 1.63)                    |    |
| 0-1                                        | 32/23843                     | Referent                             | 98/26649                     | Referent                             |    |
| 2-3                                        | 58/45246                     | 1.06 (0.69, 1.63)                    | 131/37666                    | 0.93 (0.72, 1.21)                    |    |
| ≥4                                         | 45/44116                     | 0.89 (0.56, 1.40)                    | 120/33443                    | 0.97 (0.74, 1.26)                    |    |
| HR for trend                               |                              | 0.94 (0.77, 1.15)                    |                              | 1.00 (0.88, 1.13)                    |    |

Abbreviations: CI, Confidence interval; HR, Hazard ratio.

\* P<0.05; \*\* P<0.01; \*\*\* P<0.001.

<sup>a</sup> Adjusted for attained age, menopausal status, family history of breast cancer in a first-degree relative, adult height, age at first full-term pregnancy (with a term for nulliparous women) and hormone replacement therapy use.

<sup>b</sup> Test for trend excludes those who had never had a regular period.

**Supplementary Table 3.** Sensitivity Analyses of Risk of Invasive or *In Situ* Breast Cancer in Relation to Pubertal Variables.

| Pubertal variable                               | Age <60 years<br>at baseline<br>(n=85122) |     | Excluding younger<br>relatives<br>(n=73560) |     | Invasive breast cancer<br>only as outcome<br>(n=104931) |     | <i>In situ</i> breast cancer<br>only as outcome<br>(n=92209) |    |
|-------------------------------------------------|-------------------------------------------|-----|---------------------------------------------|-----|---------------------------------------------------------|-----|--------------------------------------------------------------|----|
|                                                 | Adjusted <sup>a</sup> HR<br>(95% CI)      |     | Adjusted <sup>a</sup> HR<br>(95% CI)        |     | Adjusted <sup>a</sup> HR<br>(95% CI)                    |     | Adjusted <sup>a</sup> HR<br>(95% CI)                         |    |
| <i>Age at thelarche, years</i>                  |                                           |     |                                             |     |                                                         |     |                                                              |    |
| ≤10                                             | 1.30 (1.06, 1.60)                         | *   | 1.26 (1.01, 1.57)                           | *   | 1.25 (1.02, 1.52)                                       | *   | 1.14 (0.67, 1.94)                                            |    |
| 11-12                                           | Referent                                  |     | Referent                                    |     | Referent                                                |     | Referent                                                     |    |
| ≥13                                             | 0.82 (0.69, 0.99)                         | *   | 0.79 (0.66, 0.95)                           | *   | 0.83 (0.70, 0.97)                                       | *   | 0.62 (0.39, 1.00)                                            | *  |
| HR for trend                                    | 0.80 (0.71, 0.90)                         | *** | 0.80 (0.71, 0.90)                           | *** | 0.82 (0.74, 0.91)                                       | *** | 0.73 (0.55, 0.97)                                            | *  |
| <i>Age at menarche, years</i>                   |                                           |     |                                             |     |                                                         |     |                                                              |    |
| ≤12                                             | 1.06 (0.91, 1.24)                         |     | 1.05 (0.89, 1.23)                           |     | 1.06 (0.92, 1.22)                                       |     | 1.04 (0.72, 1.50)                                            |    |
| 13-14                                           | Referent                                  |     | Referent                                    |     | Referent                                                |     | Referent                                                     |    |
| ≥15                                             | 0.75 (0.56, 1.00)                         | *   | 0.66 (0.49, 0.90)                           | **  | 0.88 (0.69, 1.12)                                       |     | 0.15 (0.04, 0.61)                                            | ** |
| HR for trend                                    | 0.88 (0.78, 0.99)                         | *   | 0.86 (0.77, 0.97)                           | *   | 0.92 (0.83, 1.02)                                       |     | 0.70 (0.52, 0.95)                                            | *  |
| <i>Age at regular periods, years</i>            |                                           |     |                                             |     |                                                         |     |                                                              |    |
| ≤12                                             | 1.03 (0.83, 1.27)                         |     | 0.95 (0.77, 1.18)                           |     | 1.06 (0.88, 1.28)                                       |     | 0.60 (0.35, 1.02)                                            |    |
| 13-14                                           | Referent                                  |     | Referent                                    |     | Referent                                                |     | Referent                                                     |    |
| ≥15                                             | 0.69 (0.52, 0.91)                         | **  | 0.68 (0.52, 0.90)                           | **  | 0.77 (0.60, 0.98)                                       | *   | 0.53 (0.27, 1.02)                                            |    |
| Never had<br>regular periods                    | 1.30 (0.97, 1.75)                         |     | 1.09 (0.79, 1.49)                           |     | 1.24 (0.94, 1.62)                                       |     | 0.75 (0.34, 1.66)                                            |    |
| HR for trend <sup>b</sup>                       | 0.84 (0.74, 0.96)                         | *   | 0.88 (0.77, 1.00)                           |     | 0.86 (0.77, 0.97)                                       | *   | 1.01 (0.74, 1.38)                                            |    |
| <i>Age reached adult height, years</i>          |                                           |     |                                             |     |                                                         |     |                                                              |    |
| ≤14                                             | 1.24 (0.99, 1.55)                         |     | 1.41 (1.11, 1.80)                           | **  | 1.30 (1.06, 1.60)                                       | *   | 0.90 (0.49, 1.66)                                            |    |
| 15-16                                           | Referent                                  |     | Referent                                    |     | Referent                                                |     | Referent                                                     |    |
| ≥17                                             | 0.93 (0.72, 1.19)                         |     | 1.16 (0.89, 1.50)                           |     | 1.06 (0.85, 1.33)                                       |     | 1.11 (0.61, 2.01)                                            |    |
| HR for trend                                    | 0.86 (0.76, 0.98)                         | *   | 0.89 (0.78, 1.02)                           |     | 0.89 (0.79, 1.01)                                       |     | 1.11 (0.80, 1.54)                                            |    |
| <i>Growth spurt between ages 7 and 11 years</i> |                                           |     |                                             |     |                                                         |     |                                                              |    |

|     |                   |                   |                   |                   |
|-----|-------------------|-------------------|-------------------|-------------------|
| No  | Referent          | Referent          | Referent          | Referent          |
| Yes | 1.24 (0.97, 1.57) | 1.19 (0.93, 1.52) | 1.20 (0.97, 1.49) | 0.56 (0.25, 1.27) |

Abbreviations: CI, Confidence interval; HR, Hazard ratio.

\* P<0.05; \*\* P<0.01; \*\*\* P<0.001.

<sup>a</sup> Adjusted for attained age, family history of breast cancer in a first-degree relative, adult height, age at first full-term pregnancy (with a term for nulliparous women) and hormone replacement therapy status.

<sup>b</sup> Test for trend excludes those who had never had a regular period.

**Supplementary Table 4.** Sensitivity Analyses of Risk of Invasive or *In Situ* Breast Cancer in Relation to Duration Between Pubertal Events.

| Pubertal variable                          | Age <60 years<br>at baseline<br>(n=85122) | Excluding younger<br>relatives<br>(n=73560) | Invasive breast<br>cancer only<br>(n=104931) | <i>In situ</i> breast cancer<br>only as outcome<br>(n=104931) |
|--------------------------------------------|-------------------------------------------|---------------------------------------------|----------------------------------------------|---------------------------------------------------------------|
|                                            | Adjusted <sup>a</sup> HR<br>(95% CI)      | Adjusted <sup>a</sup> HR<br>(95% CI)        | Adjusted <sup>a</sup> HR<br>(95% CI)         | Adjusted <sup>a</sup> HR (95% CI)                             |
| <i>Thelarche to menarche, years</i>        |                                           |                                             |                                              |                                                               |
| <0                                         | 0.86 (0.62, 1.20)                         | 1.02 (0.74, 1.41)                           | 0.93 (0.69, 1.25)                            | 0.47 (0.17, 1.33)                                             |
| 0                                          | Referent                                  | Referent                                    | Referent                                     | Referent                                                      |
| 1                                          | 1.09 (0.90, 1.32)                         | 1.17 (0.95, 1.43)                           | 1.13 (0.95, 1.35)                            | 1.19 (0.75, 1.88)                                             |
| ≥2                                         | 1.13 (0.90, 1.43)                         | 1.33 (1.05, 1.70)                           | 1.32 (1.07, 1.63)                            | 0.93 (0.50, 1.74)                                             |
| HR for trend                               | 1.08 (0.99, 1.19)                         | 1.12 (1.02, 1.24)                           | 1.13 (1.04, 1.24)                            | 1.13 (0.89, 1.43)                                             |
| <i>Thelarche to regular periods, years</i> |                                           |                                             |                                              |                                                               |
| <0                                         | 0.89 (0.53, 1.50)                         | 1.02 (0.63, 1.63)                           | 0.95 (0.61, 1.49)                            | 0.38 (0.05, 2.96)                                             |
| 0                                          | Referent                                  | Referent                                    | Referent                                     | Referent                                                      |
| 1                                          | 0.93 (0.71, 1.22)                         | 0.80 (0.61, 1.06)                           | 0.90 (0.71, 1.15)                            | 1.05 (0.51, 2.17)                                             |
| ≥2                                         | 0.84 (0.64, 1.09)                         | 0.85 (0.65, 1.12)                           | 0.86 (0.67, 1.09)                            | 1.63 (0.83, 3.20)                                             |
| Never became<br>regular                    | 1.24 (0.89, 1.73)                         | 1.08 (0.76, 1.53)                           | 1.18 (0.87, 1.59)                            | 1.26 (0.49, 3.19)                                             |
| HR for trend <sup>b</sup>                  | 0.94 (0.84, 1.05)                         | 0.92 (0.82, 1.04)                           | 0.94 (0.85, 1.04)                            | 1.38 (1.01, 1.87)                                             |
| <i>Menarche to regular periods, years</i>  |                                           |                                             |                                              |                                                               |
| 0                                          | Referent                                  | Referent                                    | Referent                                     | Referent                                                      |
| 1                                          | 0.77 (0.62, 0.95)                         | 0.89 (0.72, 1.10)                           | 0.88 (0.72, 1.06)                            | 0.82 (0.48, 1.41)                                             |
| ≥2                                         | 0.63 (0.45, 0.87)                         | 0.61 (0.43, 0.88)                           | 0.57 (0.41, 0.79)                            | 1.41 (0.76, 2.63)                                             |
| Never became<br>regular                    | 1.21 (0.91, 1.62)                         | 1.09 (0.80, 1.49)                           | 1.15 (0.88, 1.50)                            | 0.97 (0.44, 2.16)                                             |
| HR for trend <sup>b</sup>                  | 0.78 (0.68, 0.91)                         | 0.82 (0.71, 0.95)                           | 0.80 (0.70, 0.91)                            | 1.11 (0.81, 1.51)                                             |
| <i>Menarche to adult height, years</i>     |                                           |                                             |                                              |                                                               |
| <0                                         | 0.89 (0.46, 1.70)                         | 1.07 (0.56, 2.06)                           | 0.90 (0.51, 1.59)                            | 1.00 (0.12, 8.00)                                             |

|              |                   |                   |                   |                   |
|--------------|-------------------|-------------------|-------------------|-------------------|
| 0-1          | Referent          | Referent          | Referent          | Referent          |
| 2-3          | 0.95 (0.73, 1.24) | 1.03 (0.78, 1.36) | 0.90 (0.71, 1.13) | 2.00 (0.90, 4.46) |
| ≥4           | 0.90 (0.69, 1.18) | 1.00 (0.75, 1.32) | 0.87 (0.68, 1.11) | 2.02 (0.90, 4.46) |
| HR for trend | 0.96 (0.85, 1.09) | 0.99 (0.87, 1.13) | 0.95 (0.85, 1.06) | 1.32 (0.95, 1.84) |

Abbreviations: CI, Confidence interval; HR, Hazard ratio.

\* P<0.05; \*\* P<0.01; \*\*\* P<0.001.

<sup>a</sup> Adjusted for attained age, menopausal status, family history of breast cancer in a first-degree relative, adult height, age at first full-term pregnancy (with a term for nulliparous women) and HRT use.

<sup>b</sup> Test for trend excludes those who had never had a regular period.
